# Supplementary material for: Clinical and molecular characteristics of Chryseobacterium indologenes isolates at a teaching hospital in Shanghai, China
Source: PubMed Central journal article supplement — Ann Transl Med. 2021 Apr;9(8):668. doi: 10.21037/atm-21-933 (PMC8106023; doi:10.21037/atm-21-933), 2021-04
Supplement: atm-09-08-668-supplementary.pdf [file atm-09-08-668-supplementary.pdf]

## Supplementary

**Table S1** The primers and PCR conditions for the amplification of *bla<sub>IND</sub>*

| Gene                                                                                       | Primer   | Sequence(5'-3')          | Amplicon size | Reference  |
|--------------------------------------------------------------------------------------------|----------|--------------------------|---------------|------------|
| <i>bla<sub>IND-1</sub></i> , <i>bla<sub>IND-7</sub></i>                                    | IND-1/7F | TGTTGAGCCCTTTTGCAAGT     | 460 bp        | This study |
|                                                                                            | IND-1/7R | ATCATGGGAGTGTGTGGCAA     |               |            |
| <i>bla<sub>IND-2</sub></i> , <i>bla<sub>IND-11to13</sub></i> , <i>bla<sub>IND-15</sub></i> | IND-2F   | ATGAAAAAAGTATTTCAGCTTTTG | 732 bp        | (1)        |
|                                                                                            | IND-2R   | TTATCCGGCTTTTTATTCTTATC  |               |            |
| <i>bla<sub>IND-3</sub></i> , <i>bla<sub>IND-5</sub></i> , <i>bla<sub>IND-14</sub></i>      | IND-3F   | ATGAAAAAAGAATTCAGTTC     | 720 bp        | (1)        |
|                                                                                            | IND-3R   | TTATTTTTGTGAAGAAGTTC     |               |            |
| <i>bla<sub>IND-4</sub></i>                                                                 | IND-4F   | CCTTCGGAGTTTTTGACGGC     | 367 bp        | This study |
|                                                                                            | IND-4R   | CCTTCGGAGTTTTTGACGGC     |               |            |
| <i>bla<sub>IND-5</sub></i>                                                                 | IND-5F   | AACAGGAAAGCCTTACCGCA     | 277 bp        | This study |
|                                                                                            | IND-5R   | CTCAACATGTCCTCCGCCTT     |               |            |
| <i>bla<sub>IND-6</sub></i>                                                                 | IND-6F   | CGATGACTATAGAAATTGAGGGCA | 202 bp        | This study |
|                                                                                            | IND-6R   | ATCCAGCAGCTCCAAAGTATG    |               |            |
| <i>bla<sub>IND-8</sub></i> , <i>bla<sub>IND-10</sub></i> , <i>bla<sub>IND-16</sub></i>     | IND-8F   | TTGAGCCCTTTTGCCAATGC     | 279 bp        | This study |
|                                                                                            | IND-8R   | GCTTAAGTCTCCTGCACGGT     |               |            |
| <i>bla<sub>IND-9</sub></i>                                                                 | IND-9F   | AGTCCGTTTGCTAATGCTCAG    | 390 bp        | This study |
|                                                                                            | IND-9R   | TATGTTCTACATGTCCGCCGC    |               |            |

The conditions were as follows: an initial extended denaturation step of 94 °C for 5 min, followed by 30 cycles of 30 s at 94 °C, 30 s at 54 °C, 1 min at 72 °C, and a final 5 min at 72 °C.

**Table S2** Clinical studies published in the period 2010–2019 concerning *Chryseobacterium indologenes*

| Author, year (reference)              | Country       | No. of cases | Gender (No. of patients) | Age (or average age) | Type of infection (No. of patients)                                                                                   | Underlying disease (No. of patients)                                                                                                                                                                                                   | Catheter (No. of patients)                                                             | Sensitive antimicrobial agents (sensitive rate)                                                                                                                                                         | Treatment (No. of patients)                                                                                                                                       | Outcome (No. of patients) |
|---------------------------------------|---------------|--------------|--------------------------|----------------------|-----------------------------------------------------------------------------------------------------------------------|----------------------------------------------------------------------------------------------------------------------------------------------------------------------------------------------------------------------------------------|----------------------------------------------------------------------------------------|---------------------------------------------------------------------------------------------------------------------------------------------------------------------------------------------------------|-------------------------------------------------------------------------------------------------------------------------------------------------------------------|---------------------------|
| Douvoyiannis <i>et al.</i> , 2010 (2) | USA           | 1            | Female                   | 33 days              | Bloodstream infection                                                                                                 | None                                                                                                                                                                                                                                   | None                                                                                   | TMP-SMZ, piperacillin-tazobactam, cefepime, ciprofloxacin                                                                                                                                               | Cefepime                                                                                                                                                          | Recovered                 |
| Lin <i>et al.</i> , 2010 (3)          | Taiwan, China | 16           | Male [12]; Female [4]    | 66                   | Bloodstream infection [12]; CVC related bloodstream infection [2]; Peritonitis [1]; Urinary tract infection [1]       | Diabetes mellitus [8]; hypertension [8]; Lymphoma [2]; Chronic heart insufficiency [5]; Chronic kidney disease [6]; Chronic obstructive pulmonary disease [2]; Breast cancer [1]; Prostate cancer [1]; kidney cancer [1]               | CVC [8]; urinary catheter [7]; Mechanical ventilation [3]                              | TMP-SMZ (75%), piperacillin-tazobactam (50%), cefepime (12.5%), levofloxacin (62.5%), ciprofloxacin (43.8%)                                                                                             | Appropriate antimicrobial therapy [2]                                                                                                                             | Recovered [13]; Died [3]  |
| Calderón <i>et al.</i> , 2011(4)      | Spain         | 1            | Male                     | Neonate              | VAP                                                                                                                   | Congenital heart disease                                                                                                                                                                                                               | Ventilator                                                                             | TMP-SMZ, piperacillin-tazobactam, cefepime, quinolones                                                                                                                                                  | Piperacillin-tazobactam                                                                                                                                           | Recovered                 |
| Wang <i>et al.</i> , 2011(5)          | Taiwan, China | 1            | Female                   | 68                   | Catheter-related peritonitis                                                                                          | Breast cancer                                                                                                                                                                                                                          | Intraabdominal catheter                                                                | TMP-SMZ                                                                                                                                                                                                 | TMP-SMZ                                                                                                                                                           | Recovered                 |
| Sudharani <i>et al.</i> , 2011(6)     | India         | 1            | ...                      | 3 6 weeks            | Bloodstream infection                                                                                                 | Low birth weight premature infant                                                                                                                                                                                                      | Mechanical ventilation                                                                 | Cefoperazone-sulbactam, piperacillin-tazobactam                                                                                                                                                         | Cefoperazone-sulbactam                                                                                                                                            | Recovered                 |
| Ceylan <i>et al.</i> , 2011(7)        | Turkey        | 1            | Male                     | 2 months             | Bloodstream infection and central nervous system infection                                                            | Congenital hydrocephalus                                                                                                                                                                                                               | Cerebrospinal fluid external drainage tube                                             | TMP-SMZ, ciprofloxacin, levofloxacin                                                                                                                                                                    | Ampicillin-sulbactam, and levofloxacin                                                                                                                            | Died                      |
| Chou <i>et al.</i> , 2011(8)          | Taiwan, China | 10           | Male [5]; Female [5]     | 71.1                 | Bloodstream infection [10]                                                                                            | Diabetes mellitus [3]; History of stroke [2]; Liver cirrhosis [2]; Colon tumor [2]; Stomach tumor [1]; Hepatocellular carcinoma [1]; Traumatic brain injury [1]                                                                        | Mechanical ventilation [10]; CVC [8]                                                   | TMP-SMZ (100%), minocycline(100%), ciprofloxacin (30%), levofloxacin (30%), piperacillin-tazobactam (20%), imipenem (10%)                                                                               | Appropriate antimicrobial therapy [4]                                                                                                                             | Recovered [6]; Died [4]   |
| Bhuyar <i>et al.</i> , 2012(9)        | India         | 1            | Female                   | 19                   | Urinary tract infection                                                                                               | Renal calculus                                                                                                                                                                                                                         | Malecot catheter                                                                       | Piperacillin-tazobactam                                                                                                                                                                                 | Ciprofloxacin, and piperacillin-tazobactam                                                                                                                        | Recovered                 |
| Shah <i>et al.</i> , 2012(10)         | USA           | 1            | Female                   | 26                   | Subcutaneous port-related bloodstream infection                                                                       | Liver transplant; Cystic fibrosis; Hypothyroidism; Immunosuppression                                                                                                                                                                   | Subcutaneous port                                                                      | TMP-SMZ, levofloxacin                                                                                                                                                                                   | Levofloxacin, and TMP-SMZ                                                                                                                                         | Recovered                 |
| Chen <i>et al.</i> , 2013(11)         | Taiwan, China | 113          | Male [68]; Female [45]   | 75.6                 | Pneumonia [91]; Bloodstream infection [22]; Others [38]                                                               | Congestive heart failure [21]; Chronic obstructive pulmonary disease [26]; Malignancy [32]; Chronic kidney disease [37]; History of stroke [31]; Diabetes mellitus [37]; Hypertensive cardiovascular disease [70]; Liver cirrhosis [4] | Tracheostomy [41]; Mechanical ventilation [63]; Indwelling CVC [18]                    | TMP-SMZ (94.9%), cefoperazone-sulbactam (59%), tigecycline (51.9%), ciprofloxacin (41%), levofloxacin (41%), piperacillin-tazobactam (25.6%), imipenem (7.7%), meropenem (7.7%)                         | Appropriate antimicrobial therapy [50]                                                                                                                            | Recovered [67]; Died [46] |
| Ozcan <i>et al.</i> , 2013(12)        | Turkey        | 1            | Male                     | 6 months             | Central nervous system infection                                                                                      | Congenital hydrocephalus                                                                                                                                                                                                               | Ventriculo-peritoneal shunt                                                            | TMP-SMZ, cefoperazone, ciprofloxacin, levofloxacin                                                                                                                                                      | TMP-SMZ, and cefoperazone-sulbactam                                                                                                                               | Recovered                 |
| Yasmin <i>et al.</i> , 2013(13)       | USA           | 1            | Female                   | 32                   | VAP                                                                                                                   | Metastatic breast cancer; Respiratory failure                                                                                                                                                                                          | Prolonged mechanical ventilation; Tracheostomy                                         | TMP-SMZ, ciprofloxacin, levofloxacin                                                                                                                                                                    | Levofloxacin                                                                                                                                                      | Died                      |
| Monteen <i>et al.</i> , 2013(14)      | USA           | 1            | Male                     | 66                   | VAP                                                                                                                   | Trauma; Diabetes mellitus; Hypertension; Small-bowel resection                                                                                                                                                                         | Mechanical ventilation                                                                 | Piperacillin/tazobactam, cefepime, imipenem, ciprofloxacin, gentamicin, amikacin                                                                                                                        | Ampicillin-sulbactam, and moxifloxacin                                                                                                                            | Recovered                 |
| Afshar <i>et al.</i> , 2013(15)       | USA           | 1            | Male                     | 51                   | Peritoneal dialysis-related peritonitis                                                                               | End-stage renal disease; HIV; Hypertension                                                                                                                                                                                             | Peritoneal dialysis catheter                                                           | TMP-SMZ, piperacillin/tazobactam, cefepime, ceftazidime, ciprofloxacin,                                                                                                                                 | Ceftazidime                                                                                                                                                       | Recovered                 |
| Hendaus <i>et al.</i> , 2013(16)      | Qatar         | 1            | Female                   | Neonate              | Meningitis                                                                                                            | None                                                                                                                                                                                                                                   | None                                                                                   | TMP-SMZ, cefepime                                                                                                                                                                                       | Cefepime                                                                                                                                                          | Recovered                 |
| Gauna <i>et al.</i> , 2013(17)        | Brazil        | 5            | ...                      | ...                  | Bacteremia [5]                                                                                                        | End-stage renal disease [5]; Hemodialysis [5]                                                                                                                                                                                          | CVC [5]                                                                                | ...                                                                                                                                                                                                     | ...                                                                                                                                                               | ...                       |
| Olbrih <i>et al.</i> , 2013(18)       | Spain         | 1            | Male                     | 11 months            | Central nervous system infection                                                                                      | Holoprosencephaly; Obstructive; Hydrocephalus                                                                                                                                                                                          | Post-natal ventriculoperitoneal shunt                                                  | TMP-SMZ, ceftazidime, cefepime, ciprofloxacin                                                                                                                                                           | TMP-SMZ, and ceftazidime                                                                                                                                          | Recovered                 |
| Eshwara <i>et al.</i> , 2014(19)      | India         | 1            | Female                   | Neonate              | Neonatal meningitis and sepsis                                                                                        | Small for gestational age                                                                                                                                                                                                              | None                                                                                   | TMP-SMZ, ciprofloxacin                                                                                                                                                                                  | Ciprofloxacin                                                                                                                                                     | Recovered                 |
| Wang <i>et al.</i> , 2014(20)         | China         | 1            | Male                     | 73                   | Central nervous system infection                                                                                      | Subarachnoid hemorrhage Ruptured middle cerebral artery aneurysm Hypertension                                                                                                                                                          | Lumbar external drainage                                                               | TMP-SMZ                                                                                                                                                                                                 | TMP/SMZ, SMZ, and teicoplanin                                                                                                                                     | Recovered                 |
| Deng <i>et al.</i> , 2015(21)         | China         | 23           | Male [14]; Female [9]    | 48.2                 | Urinary tract infection [9]; Pneumonia [7]; Bacteremia [6]; Central nervous system infection [1]                      | Organ cancer [5]; Leukemia [4]; AlloHSCT [2]; Chemotherapy [2]; Post-renal transplantation [1]                                                                                                                                         | CVC [1]; Ventilator [2]; Tracheotomy [1]                                               | TMP-SMZ (73.9%), piperacillin/tazobactam (26.1%), minocycline (21.7%)                                                                                                                                   | Appropriate antimicrobial therapy [5]                                                                                                                             | Recovered [19]; Died [4]  |
| Nemli <i>et al.</i> , 2015(22)        | Turkey        | 1            | Male                     | 82                   | VAP                                                                                                                   | Respiratory failure; Trauma                                                                                                                                                                                                            | Tracheostomy                                                                           | Levofloxacin                                                                                                                                                                                            | Ertapenem, and levofloxacin                                                                                                                                       | Recovered                 |
| Esposito <i>et al.</i> , 2015(23)     | Italy         | 1            | Female                   | 51                   | Bacteremia                                                                                                            | Chronic obstructive; Pulmonary disease; Hypertension; Bradycardia; Ischemic heart disease; Bilateral carotid atheroma                                                                                                                  | None                                                                                   | TMP-SMZ, ciprofloxacin                                                                                                                                                                                  | None                                                                                                                                                              | Recovered                 |
| Srinivasan <i>et al.</i> , 2016(24)   | India         | 1            | Female                   | 11                   | Soft tissue infection                                                                                                 | None                                                                                                                                                                                                                                   | None                                                                                   | Ceftazidime, imipenem, levofloxacin, ciprofloxacin, cotrimoxazole, minocycline                                                                                                                          | Ceftazidime, and metronidazole                                                                                                                                    | Recovered                 |
| Baruah <i>et al.</i> , 2016(25)       | India         | 1            | Female                   | 22                   | Bacteremia                                                                                                            | None                                                                                                                                                                                                                                   | None                                                                                   | Piperacillin, piperacillin-tazobactam, ofloxacin, ciprofloxacin                                                                                                                                         | Ciprofloxacin                                                                                                                                                     | Recovered                 |
| Atici <i>et al.</i> , 2016(26)        | Turkey        | 1            | Female                   | 3 months             | VAP                                                                                                                   | Meningomyelocele Congenital Diaphragmatic hernia                                                                                                                                                                                       | Ventriculo-peritoneal shunt Mechanical Ventilation                                     | Piperacillin-tazobactam, cefepime, ciprofloxacin, levofloxacin,                                                                                                                                         | Ciprofloxacin                                                                                                                                                     | Recovered                 |
| Aykac <i>et al.</i> , 2016(27)        | Turkey        | 6            | Male (3); Female (3)     | 22.9 months          | Bloodstream infection [2]; CVC related bloodstream infection [2]; Pneumonia [1]; Central nervous system infection [1] | Congenital heart disease [1]; Congenital metabolic disease [1]; Congenital hydrocephalus [1]; Nephrotic syndrome with cystic fibrosis [1]; Intestinal obstruction [1]; Congenital thrombocytopenic purpura [1]                         | Mechanical ventilation [1]; CVC [3]; Ventriculo-peritoneal shunt [1]; None [2]         | Ciprofloxacin (83.3%), piperacillin/tazobactam (66.6%), cefepime (66.6%), ceftazidime (50%), amikacin (50%)                                                                                             | Ciprofloxacin, imipenem and linezolid [1] Ciprofloxacin, and TMP-SMZ [1] Ceftriaxone [2] Meropenem, and amikacin [1] Ciprofloxacin, meropenem, and vancomycin [1] | Recovered [5]; Died [1]   |
| Osamu <i>et al.</i> , 2017(28)        | Japan         | 1            | Female                   | 64                   | VAP                                                                                                                   | T-cell leukemia/lymphoma; Human herpes virus (type 6); Meningoencephalitis                                                                                                                                                             | Tracheostomy                                                                           | Ceftazidime, piperacillin-tazobactam, cefoperazone-sulbactam, minocycline, amikacin                                                                                                                     | Piperacillin/tazobactam, and meropenem                                                                                                                            | Died                      |
| Antonello <i>et al.</i> , 2017(29)    | Brazil        | 1            | Male                     | 10 days              | VAP                                                                                                                   | Meconium in the amniotic fluid; HIV exposure                                                                                                                                                                                           | Mechanical ventilation                                                                 | Piperacillin-tazobactam, cefepime, ceftazidime                                                                                                                                                          | Cefepime                                                                                                                                                          | Recovered                 |
| Das <i>et al.</i> , 2017(30)          | India         | 1            | Female                   | 10 weeks             | VAP                                                                                                                   | Atrioventricular canal defect; Hyperkinetic pulmonary arterial hypertension                                                                                                                                                            | Mechanical ventilation                                                                 | TMP/SMZ, cefepime, ciprofloxacin                                                                                                                                                                        | Cefepime                                                                                                                                                          | Recovered                 |
| Corbella <i>et al.</i> , 2017(31)     | Italy         | 1            | Male                     | 11                   | Catheter-related bloodstream infection                                                                                | Ewing's sarcoma; Chemotherapy                                                                                                                                                                                                          | CVC                                                                                    | TMP/SMZ, ciprofloxacin, levofloxacin                                                                                                                                                                    | Ciprofloxacin                                                                                                                                                     | Recovered                 |
| Soydan <i>et al.</i> , 2017(32)       | Turkey        | 1            | Male                     | 69                   | pneumonia                                                                                                             | Chronic obstructive pulmonary disease                                                                                                                                                                                                  | None                                                                                   | None                                                                                                                                                                                                    | Levofloxacin                                                                                                                                                      | Recovered                 |
| Kaur <i>et al.</i> , 2017(33)         | India         | 9            | Male [6]; Female [3]     | 48.2                 | Urinary tract infection (9)                                                                                           | Renal stone disease [5]; Carcinoma urinary bladder [3]; Transitional cell carcinoma [1]; Chronic obstructive pulmonary disease [2]; Diabetes mellitus [2]; Hypertension [1]                                                            | Urinary catheter or nephrostomy [9]                                                    | ...                                                                                                                                                                                                     | Amikacin, and ceftriaxone [4]; TMP/SMZ [3]; Levofloxacin, and TMP/SMZ [1]; Nitrofurantion, and amoxicillin [1]                                                    | Recovered [9]             |
| Mehta <i>et al.</i> , 2018(34)        | India         | 1            | Male                     | Neonate              | Bloodstream infection                                                                                                 | Low birth weight premature infants; Acute respiratory distress syndrome; Neonatal jaundice                                                                                                                                             | Mechanical ventilation                                                                 | Cefoperazone-sulbactam, imipenem, meropenem, amikacin, gentamicin, ciprofloxacin                                                                                                                        | Ciprofloxacin                                                                                                                                                     | Recovered                 |
| Lin <i>et al.</i> , 2018(35)          | Taiwan, China | 5            | ...                      | ...                  | Bloodstream infection [5]                                                                                             | Burn [5]                                                                                                                                                                                                                               | CVC [3]                                                                                | ...                                                                                                                                                                                                     | ...                                                                                                                                                               | ...                       |
| Carvalho <i>et al.</i> , 2018(36)     | Portugal      | 1            | Male                     | 76                   | Peritonitis                                                                                                           | End-stage renal disease Peritoneal dialysis Atrial fibrillation Arterial hypertension Pulmonary emphysema Smoker                                                                                                                       | Peritoneal dialysis catheter                                                           | ...                                                                                                                                                                                                     | Ceftazidime, and ciprofloxacin                                                                                                                                    | Recovered                 |
| Mirza <i>et al.</i> , 2018(37)        | Turkey        | 16           | Male [2]; Female [14]    | 3.4                  | Pneumonia [15]; Bacteremia [1]                                                                                        | Cystic fibrosis [15]; Operated on for craniopharyngioma [1]                                                                                                                                                                            | CVC [1]; Ventilator [1]                                                                | Ciprofloxacin (100%), levofloxacin (100%), TMP/SMZ (100%), piperacillin-tazobactam (100%), ceftazidime (100%), cefepime (100%), imipenem (81.2%), meropenem (81.2%), amikacin (25%), gentamicin (18.8%) | ...                                                                                                                                                               | ...                       |
| Cantero <i>et al.</i> , 2018(38)      | Spain         | 4            | ...                      | ...                  | Pneumonia [4]                                                                                                         | ...                                                                                                                                                                                                                                    | ...                                                                                    | ...                                                                                                                                                                                                     | ...                                                                                                                                                               | Recovered [1]; Died [3]   |
| Jain <i>et al.</i> , 2018(39)         | India         | 11           | ...                      | 54.2                 | Bacteremia [6]; Ventilation-associated pneumonia [2]; Urinary tract infection [4]                                     | Diabetes mellitus [7]; Hypertension [9]; History of stroke [4]; Coronary artery disease [5]; End-stage renal disease [3]                                                                                                               | Tracheostomy [4]; Central line catheter [8]; Recent surgery [9]; Urinary catheter [12] | TMP/SMZ (91.67%), levofloxacin (75%), ciprofloxacin (41.67%), piperacillin-tazobactam (16.67%).                                                                                                         | ...                                                                                                                                                               | Recovered [7]; Died [4]   |
| Agarwal <i>et al.</i> , 2018(40)      | ...           | 2            | Male [1]; Female [1]     | 64.5                 | CVC related bacteremia [1]; VAP [1]                                                                                   | Breast cancer [1]; Multiple connective tissue disorder [1]; Interstitial lung disease [1]; Hypertension [1]                                                                                                                            | CVC [1] Ventilator [1]                                                                 | None                                                                                                                                                                                                    | None                                                                                                                                                              | Died [2]                  |
| Mirza <i>et al.</i> , 2019(41)        | Pakistan      | 1            | Male                     | Neonate              | Bacteremia                                                                                                            | Low birth weight premature infant                                                                                                                                                                                                      | Ventilator                                                                             | TMP-SMZ, piperacillin-tazobactam, cefoperazone-sulbactam, ciprofloxacin, levofloxacin,                                                                                                                  | Cefotaxime, and amikacin                                                                                                                                          | Died                      |
| Lin <i>et al.</i> , 2019(42)          | Taiwan, China | 84           | Male [59]; Female [25]   | 59.1                 | ...                                                                                                                   | Diabetes mellitus [35]; Cardiovascular disease [42]; End-stage renal disease [4]; Malignancy [21]; Liver cirrhosis [7]; Chronic obstructive pulmonary disease [8]                                                                      | ...                                                                                    | Minocycline (73%), TMP-SMZ (47.6%), levofloxacin (32.5%), tigecycline (34.1%), piperacillin-tazobactam (19.8%), piperacillin (19%), ciprofloxacin (18.3%), cefepime (17.5%), ceftazidime (13.5%)        | Appropriate antimicrobial therapy [10]                                                                                                                            | Recovered [63]; Died [21] |
| Bhagawati <i>et al.</i> , 2019(43)    | India         | 1            | Male                     | 59                   | Bacteremia                                                                                                            | Squamous cell carcinoma                                                                                                                                                                                                                | CVC                                                                                    | Minocycline                                                                                                                                                                                             | Levofloxacin, and minocycline                                                                                                                                     | Died                      |
| Arif <i>et al.</i> , 2019(44)         | India         | 1            | Male                     | 42                   | Pleural effusion                                                                                                      | None                                                                                                                                                                                                                                   | None                                                                                   | TMP-SMZ, minocycline, tigecycline                                                                                                                                                                       | Tigecycline, and cotrimoxazole                                                                                                                                    | Recovered                 |
| Cooper <i>et al.</i> , 2019(45)       | Israeli       | 9            | Male [6]; Female [3]     | 5.6                  | ...                                                                                                                   | Hematological malignances [6]; Hunter disease [1]; Cardiomyopathy [1]; Prematurity [1]; Congenital military tuberculosis [1]                                                                                                           | Tracheostomy [1]; CVC [2]; Mechanical ventilation [1]                                  | ...                                                                                                                                                                                                     | ...                                                                                                                                                               | Recovered [7]; Died [2]   |

Note: appropriate antimicrobial therapy was defined if the isolates were susceptible to the prescribed antibiotics. AlloHSCT: allogeneic hematopoietic stem cell transplantation; CVC: central venous catheter; VAP: Ventilator-associated pneumonia; TMP-SMZ: Trimethoprim-sulfamethoxazole; \*Information not available

## References

1. Lin XH, Xu YH, Cheng J, et al. Heterogeneity of bla(IND) metallo-beta-lactamase-producing *Chryseobacterium indologenes* isolates detected in Hefei, China. *Int J Antimicrob Agents* 2008;32:398-400.
2. Douvoyiannis M, Kalyoussef S, Philip G, et al. *Chryseobacterium indologenes* bacteremia in an infant. *Int J Infect Dis* 2010;14:e531-2.
3. Lin YT, Jeng YY, Lin ML, et al. Clinical and microbiological characteristics of *Chryseobacterium indologenes* bacteremia. *J Microbiol Immunol Infect* 2010;43:498-505.
4. Calderón G, García E, Rojas P, et al. *Chryseobacterium indologenes* infection in a newborn: a case report. *J Med Case Rep* 2011;5:10.
5. Wang YC, Yeh KM, Chiu SK, et al. *Chryseobacterium indologenes* peritonitis in a patient with malignant ascites. *Int Med Case Rep J* 2011;4:13-5.
6. Sudharani V, Asiya, Saxena NK. *Chryseobacterium indologenes* bacteraemia in a preterm baby. *Indian J Med Microbiol* 2011;29:196-8.
7. Ceylan A, Güdücüoğlu H, Akbayram S, et al. Sepsis caused by *Chryseobacterium indologenes* in a patient with hydrocephalus. *Mikrobiyol Bul* 2011;45:735-40.
8. Chou DW, Wu SL, Lee CT, et al. Clinical characteristics, antimicrobial susceptibilities, and outcomes of patients with *Chryseobacterium indologenes* bacteremia in an intensive care unit. *Jpn J Infect Dis* 2011;64(6):520-4.
9. Bhuyar G, Jain S, Shah H, et al. Urinary tract infection by *Chryseobacterium indologenes*. *Indian J Med Microbiol* 2012;30:370-2.
10. Shah S, Sarwar U, King EA, et al. *Chryseobacterium indologenes* subcutaneous port-related bacteremia in a liver transplant patient. *Transpl Infect Dis* 2012;14:398-402.
11. Chen FL, Wang GC, Teng SO, et al. Clinical and epidemiological features of *Chryseobacterium indologenes* infections: analysis of 215 cases. *J Microbiol Immunol Infect* 2013;46:425-32.
12. Ozcan N, Dal T, Tekin A, et al. Is *Chryseobacterium indologenes* a shunt-lover bacterium? A case report and review of the literature. *Infez Med* 2013;21:312-6.
13. Yasmin S, Garcia G, Sylvester T, et al. *Chryseobacterium indologenes* in a woman with metastatic breast cancer in the United States of America: a case report. *J Med Case Rep* 2013;7:190.
14. Monteen M, Ponnappa S, Wood G, et al. Treatment of *Chryseobacterium indologenes* ventilator-associated pneumonia in a critically ill trauma patient. *Ann Pharmacother* 2013;47(12):1736-9.
15. Afshar M, Nobakht E, Lew SQ. *Chryseobacterium indologenes* peritonitis in peritoneal dialysis. *BMJ Case Rep* 2013;2013:bcr2013009410.
16. Hendaus MA, Zahradin K. *Chryseobacterium indologenes* meningitis in a healthy newborn: a case report. *Oman Med J* 2013;28(2):133-4.
17. Gauna TT, Oshiro E, Luzio YC, et al. Bloodstream infection in patients with end-stage renal disease in a teaching hospital in central-western Brazil. *Rev Soc Bras Med Trop* 2013;46(4):426-32.
18. Olbrich P, Rivero-Garvía M, Falcón-Neyra MD, et al. *Chryseobacterium indologenes* central nervous system infection in infancy: an emergent pathogen? *Infection* 2014;42(1):179-83.
19. Eshwara V, Sasi A, Munim F, et al. Neonatal meningitis and sepsis by *Chryseobacterium indologenes*: a rare and resistant bacterium. *Indian J Pediatr* 2014;81(6):611-3.
20. Wang X, Hu Z, Fan Y, et al. *Chryseobacterium indologenes* catheter-related meningitis in an elderly patient after intracranial aneurysm clipping surgery. *Neurol Sci* 2014, 35(1): 113-5.
21. Deng L, Li MF, Li YH, et al. *Chryseobacterium indologenes* in four patients with leukemia. *Transpl Infect Dis* 2015;17(4):583-7.
22. Nemli SA, Demirdal T, Ural S. A case of healthcare associated pneumonia caused by *Chryseobacterium indologenes* in an immunocompetent patient. *Case Rep Infect Dis* 2015;2015:483923.
23. Esposito S, Russo E, De Simone G, et al. Transient bacteraemia due to *Chryseobacterium indologenes* in an immunocompetent patient: a case report and literature review. *J Chemother* 2015;27:324-9.
24. Srinivasan G, Muthusamy S, Raveendran V, et al. Unforeseeable presentation of *Chryseobacterium indologenes* infection in a paediatric patient. *BMC Res Notes* 2016;9:212.
25. Baruah M, Lyngdoh C, Lyngdoh WV, et al. Noncatheter-related bacteraemia due to *Chryseobacterium indologenes* in an immunocompetent patient. *Indian J Med Microbiol* 2016;34(3):380-1.
26. Atıcı S, Ünkar ZA, Erdem K, et al. Ventilator-associated pneumonia caused by *Chryseobacterium indologenes*: a rare infant case and review of the literature. *SpringerPlus* 2016;5(1):1741.
27. Aykac K, Ozsurekci Y, Tuncer O, et al. Six cases during 2012-2015 and literature review of *Chryseobacterium*

- indologenes infections in pediatric patients. *Can J Microbiol* 2016;62(10):812-9.
28. Imataki O, Uemura M. *Chryseobacterium indologenes*, a possible emergent organism resistant to carbapenem antimicrobials after stem cell transplantation. *Clin Case Rep* 2017;5(1):22-5.
  29. Antonello VS, Daht P, Polli J, et al. Ventilator-associated pneumonia in neonatal intensive care unit due to *Chryseobacterium indologenes*. *Pediatr Infect Dis J* 2017;36:e353-e355.
  30. Das P, Karade S, Kaur K, et al. *Chryseobacterium indologenes* pneumonitis in an infant: a case report. *J Clin Diagn Res* 2017;11(6):Dd07-dd8.
  31. Corbella M, Brandolini M, Cambieri P, et al. A catheter-related bloodstream infection caused by *Chryseobacterium indologenes* successfully treated with antibiotic-lock rescue therapy. *New Microbiol* 2017;40(3):223-5.
  32. Soydan S, Ignak S, Unay Demirel O, et al. *Chryseobacterium indologenes* infection in a patient with chronic obstructive pulmonary disease. *Drug Discov Ther* 2017;11(3):165-7.
  33. Kaur H, Mohan B, Hallur V, et al. Increased recognition of *Chryseobacterium* species as an emerging cause of nosocomial urinary tract infection following introduction of matrix-assisted laser desorption/ionisation-time of flight for bacterial identification. *Indian J Med Microbiol* 2017;35(4):610-6.
  34. Mehta R, Pathak A. Emerging *Chryseobacterium indologenes* infection in Indian neonatal intensive care units: a case report. *Antibiotics* 2018;7(4):109.
  35. Lin TC, Wu RX, Chiu CC, et al. The clinical and microbiological characteristics of infections in burn patients from the Formosa fun coast dust explosion. *J Microbiol Immunol Infect* 2018;51(2):267-77.
  36. Carvalho T, Branco P, Martins A, et al. *Chryseobacterium indologenes* peritonitis in a peritoneal dialysis patient. *BMJ Case Rep* 2018;11(1): e227713.
  37. Mirza HC, Tuncer O, Olmez S, et al. Clinical strains of *Chryseobacterium* and *Elizabethkingia* spp. isolated from pediatric patients in a university hospital: performance of MALDI-TOF MS-based identification, antimicrobial susceptibilities, and baseline patient characteristics. *Microb Drug Resist* 2018;24:816-21.
  38. Cantero M, Parra LM, Munez E, et al. A cluster of *Chryseobacterium indologenes* cases related to drainage water in intensive care units. *Infect Control Hosp Epidemiol* 2018;39:997-9.
  39. Jain V, Sahu C, Afzal Hussain N, et al. The era of device colonizers: *Chryseobacterium indologenes* infections from a tertiary care center in north India. *Indian J Crit Care Med* 2018; 22(7):537-40.
  40. Agarwal S, Kakati B, Khanduri S. Severe sepsis due to *Chryseobacterium indologenes*, a possible emergent multidrug-resistant organism in intensive care unit-acquired infections. *Indian J Crit Care Med* 2018; 22(11):817-9.
  41. Mirza IA, Khalid A, Hameed F, et al. *Chryseobacterium indologenes* as a novel cause of bacteremia in a neonate. *J Coll Physicians Surg Pak* 2019;29(4):375-8.
  42. Lin JN, Lai CH, Yang CH, et al. Differences in clinical manifestations, antimicrobial susceptibility patterns, and mutations of fluoroquinolone target genes between *Chryseobacterium gleum* and *Chryseobacterium indologenes*. *Antimicrob Agents Chemother* 2019;63:e02256-18.
  43. Bhagawati G, Bhardwaj A, Sajikumar R, et al. Bacteremia by *Chryseobacterium indologenes* in a patient with lung cancer: a clinical and microbiological investigation. *Indian J Crit Care Med* 2019;23(3):157-9.
  44. Arif N, Khullar S, Kumar R, et al. Pleural effusion due to *Chryseobacterium indologenes*: case report and review of literature. *J Lab Physicians* 2019;11(3):284-6.
  45. Cooper S, Levy I, Ben-Zvi H, et al. Flavobacteriaceae Bacteremia in Children: A Multicenter Study. *Pediatr Infect Dis J* 2019;38(11):1096-9.
